# Supplementary material for: PMMA/SWCNT Composites with Very Low Electrical Percolation Threshold by Direct Incorporation and Masterbatch Dilution and Characterization of Electrical and Thermoelectrical Properties
Source: MDPI journal article supplement (doi:10.3390/nano13081431), 2023-04-21
Supplement: s1 [file s1]

## Supporting informations

# PMMA/SWCNT Composites with Very Low Electrical Percolation Threshold by Direct Incorporation and Masterbatch Dilution and Characterization of Electrical and Thermoelectrical Properties

Ezgi Uçar <sup>1,2</sup>, Mustafa Dogu <sup>3</sup>, Elcin Demirhan <sup>2</sup> and Beate Krause <sup>1,\*</sup>

<sup>1</sup> Leibniz-Institut für Polymerforschung Dresden e.V. (IPF), Hohe Str. 6, 01069 Dresden, Germany; ezgiucar@gmail.com

<sup>2</sup> Chemical Engineering Department, Yildiz Technical University, Davutpasa Campus, Esenler, 34220 Istanbul, Türkiye; demirhan@yildiz.edu.tr

<sup>3</sup> Mir Ar-Ge Inc., Research Department, Esenyurt, 34522 Istanbul, Türkiye; mus.dogu@gmail.com

\* Correspondence: krause-beate@ipfdd.de; Tel.: +49-351-4658-736

**Table S1.** Thermoelectric properties of PMMA/SWCNT composites

| SWCNT content<br>wt% | Seebeck coefficient<br>$\mu\text{V/K}$ | Volume conductivity<br>S/m | Power factor<br>$\mu\text{W}/(\text{m}\cdot\text{K}^2)$ |
|----------------------|----------------------------------------|----------------------------|---------------------------------------------------------|
| 0.25                 | $50.6 \pm 4.3$                         | $2.3 \pm 0.0$              | 0.006                                                   |
| 0.5                  | $51.4 \pm 4.4$                         | $4.3 \pm 0.4$              | 0.011                                                   |
| 1                    | $51.6 \pm 0.7$                         | $17.4 \pm 2.8$             | 0.046                                                   |
| 2                    | $53.4 \pm 2.2$                         | $57.2 \pm 9.6$             | 0.163                                                   |
| 3                    | $46.3 \pm 4.2$                         | $96.7 \pm 4.2$             | 0.207                                                   |
| 5                    | $35.8 \pm 1.0$                         | $144.5 \pm 38.0$           | 0.185                                                   |

**Table S2.** Comparison of glass transition temperature T<sub>g</sub> values of composites with the change of SWCNT (Tuball) amount

| Sample                          | T <sub>g</sub> (°C) |
|---------------------------------|---------------------|
| PMMA -250+direct                | 113.7               |
| PMMA+0.05 wt%Tuball-250+direct  | 114.6               |
| PMMA+0.075 wt%Tuball-250+direct | 114.5               |
| PMMA+0.1 wt%Tuball-250+direct   | 115.0               |
| PMMA+0.2 wt%Tuball-250+direct   | 114.5               |
| PMMA+0.25 wt%Tuball-250+direct  | 115.8               |
| PMMA+0.5 wt%Tuball-250+direct   | 115.7               |
| PMMA+1 wt%Tuball-250+direct     | 115.6               |
| PMMA+2 wt%Tuball-250+direct     | 116.1               |
| PMMA+3 wt%Tuball-250+direct     | 116.6               |
| PMMA+5 wt%Tuball-250+direct     | 117.0               |

**Table S3.** Comparison of glass transition temperature Tg values of composites prepared at different rotation speeds

| Sample                         | Tg (°C) |
|--------------------------------|---------|
| PMMA+0.1 wt%Tuball-250+direct  | 115.5   |
| PMMA+0.1 wt%Tuball -200+direct | 113.9   |
| PMMA+0.1 wt%Tuball-150+direct  | 114.9   |
| PMMA+0.1 wt%Tuball-100+direct  | 114.6   |
| PMMA+0.1 wt%Tuball -50+direct  | 114.4   |
| PMMA+1 wt%Tuball-250+direct    | 116.4   |
| PMMA+1 wt%Tuball-200+direct    | 115.7   |
| PMMA+1 wt%Tuball-150+direct    | 115.2   |
| PMMA+1 wt%Tuball-100+direct    | 114.8   |
| PMMA+1 wt%Tuball-50+direct     | 114.6   |
| PMMA+0.25 wt%Tuball-250+direct | 116.2   |
| PMMA+0.25 wt%Tuball-200+direct | 115.1   |
| PMMA+0.25 wt%Tuball-150+direct | 114.0   |
| PMMA+0.25 wt%Tuball-100+direct | 113.9   |
| PMMA+0.25 wt%Tuball-50+direct  | 113.9   |
